# Supplementary material
Source: publisher figshare collection journal article supplement (https://gsajournals.figshare.com/articles/dataset/_/8796686)
Supplement: Supplementary file 1 [file 1]

1 **Table S1. Strains used in this study.**

2

| <b>Strain</b>      | <b>Parent</b> | <b>Genotype</b>                                                                  | <b>Reference</b>          |                           |
|--------------------|---------------|----------------------------------------------------------------------------------|---------------------------|---------------------------|
| SC5314             |               | Wild type                                                                        | Gillum <i>et al.</i> 1984 |                           |
| CAF2-1             | SC5314        | $\Delta ura3::imm434/URA3$                                                       | <i>URA3</i>               | Fonzi and Irwin 1993      |
| CAI4               | CAF2-1        | $\Delta ura3::imm434/\Delta ura3::imm434$                                        | <i>ura3</i>               | Fonzi and Irwin 1993      |
| CAGL1A             | CAI4          | $RAD52/\Delta rad52A::hisG-URA3-hisG$                                            | <i>RAD52, URA3</i>        | This work                 |
| CAGL1A.1           | CAGL1A        | $RAD52/\Delta rad52A::hisG$                                                      | <i>RAD52, ura3</i>        | This work                 |
| CAGL1B (TCR1)*     | CAI4          | $RAD52/\Delta rad52B::hisG-URA3-hisG$                                            | <i>RAD52, URA3</i>        | Ciudad <i>et al.</i> 2004 |
| CAGL1B.1 (TCR1.1)* | CAGL1B (TCR1) | $RAD52/\Delta rad52B::hisG$                                                      | <i>RAD52, ura3</i>        | Ciudad <i>et al.</i> 2004 |
| CAGL2A             | CAGL17.1      | $RAD52/\Delta rad52A::hisG-URA3-hisG$<br>$\Delta rad59::hisG/\Delta rad59::hisG$ | <i>rad52, URA3, rad59</i> | This work                 |
| CAGL2A.1           | CAGL2A        | $RAD52/\Delta rad52A::hisG$<br>$\Delta rad59::hisG/\Delta rad59::hisG$           | <i>RAD52, ura3, rad59</i> | This work                 |
| CAGL2B             | CAGL17        | $RAD52/\Delta rad52B::hisG-URA3-hisG$<br>$\Delta rad59::hisG/\Delta rad59::hisG$ | <i>rad52, URA3, rad59</i> | This work                 |
| CAGL2B.1           | CAGL2B        | $RAD52/\Delta rad52B::hisG$<br>$\Delta rad59::hisG/\Delta rad59::hisG$           | <i>RAD52, ura3, rad59</i> | This work                 |

|                        |          |                                                                                  |                                               |                                  |
|------------------------|----------|----------------------------------------------------------------------------------|-----------------------------------------------|----------------------------------|
| CAGL3A                 | CAGL19   | <i>RAD52/Δrad52A::hisG-URA3-hisG</i><br><i>Δrad51::hisG/Δrad51::hisG</i>         | <i>RAD52,</i><br><i>URA3,</i><br><i>rad51</i> | This work                        |
| CAGL3B                 | CAGL19   | <i>RAD52/Δrad52B::hisG-URA3-hisG</i><br><i>Δrad51::hisG/Δrad51::hisG</i>         | <i>RAD52,</i><br><i>URA3,</i><br><i>rad51</i> | This work                        |
| CAGL4A<br>(TCR2.1)*    | CAGL1B.1 | <i>Δrad52::hisG /Δrad52a::hisG-URA3-hisG</i>                                     | <i>rad52,</i><br><i>URA3</i>                  | Ciudad <i>et al.</i> 2004        |
| CAGL4.1A<br>(TCR2.2)*  | CAGL1B.1 | <i>Δrad52::hisG /Δrad52A::hisG-URA3-hisG</i>                                     | <i>rad52,</i><br><i>URA3</i>                  | Ciudad <i>et al.</i> 2004        |
| CAGL4B                 | CAGL1A.1 | <i>Δrad52::hisG /Δrad52B::hisG-URA3-hisG</i>                                     | <i>rad52,</i><br><i>URA3</i>                  | This work                        |
| CAGL5A                 | CAGL2B.1 | <i>Δrad52/Δrad52A::hisG-URA3-hisG</i><br><i>Δrad59::hisG/Δrad59::hisG</i>        | <i>rad52,</i><br><i>URA3,</i><br><i>rad59</i> | This work                        |
| CAGL5B<br>(TYB6.1)*    | CAGL2A.1 | <i>Δrad52::hisG /Δrad52B::hisG-URA3-hisG</i><br><i>Δrad59::hisG/Δrad59::hisG</i> | <i>rad52,</i><br><i>URA3,</i><br><i>rad59</i> | Bellido <i>et al.</i> 2015       |
| CAGL6-B<br>(EAT2)*     | EAT1.1   | <i>Δrad52::hisG /Δrad52B::hisG-URA3-hisG</i><br><i>Δlig4::hisG/Δlig4::hisG</i>   | <i>rad52,</i><br><i>URA3,</i><br><i>lig4</i>  | Ciudad <i>et al.</i> 2004        |
| CAGL17.1<br>(BNC23.1)* | BCN1.1   | <i>Δrad59::hisG/Δrad59::hisG</i>                                                 | <i>RAD52,</i><br><i>ura3,</i><br><i>rad59</i> | Bellido <i>et al.</i> 2015       |
| CAGL19<br>(JGR5A)*     | JGR5     | <i>Δrad51::hisG/Δrad51::hisG</i>                                                 | <i>ura3,</i><br><i>rad51</i>                  | García-Prieto <i>et al.</i> 2010 |
| CAGL01<br>(EAT1)*      | CEA2.5   | <i>RAD52/Δrad52A::hisG-URA3-hisG</i><br><i>Δlig4::hisG/Δlig4::hisG</i>           | <i>RAD52,</i><br><i>URA3,</i><br><i>lig4</i>  | Ciudad <i>et al.</i> 2004        |

|                             |                             |                                                                                            |                                               |                                     |
|-----------------------------|-----------------------------|--------------------------------------------------------------------------------------------|-----------------------------------------------|-------------------------------------|
| EAT1.1                      | EAT1                        | <i>RAD52/Δrad52A::hisG</i><br><i>Δlig4::hisG/Δlig4::hisG</i>                               | <i>RAD52,</i><br><i>ura3, lig4</i>            | Ciudad <i>et</i><br><i>al.</i> 2004 |
| CAGL4A-SAT-NTC <sup>R</sup> | CAGL1A                      | <i>Δrad52::SAT /Δrad52A::hisG-</i><br><i>URA3-hisG</i>                                     | <i>rad52,</i><br><i>URA3</i>                  | This work                           |
| CAGL4B-SAT-NTC <sup>R</sup> | CAGL1B                      | <i>Δrad52::SAT /Δrad52B::hisG-</i><br><i>URA3-hisG</i>                                     | <i>rad52,</i><br><i>URA3</i>                  | This work                           |
| CAGL5A-SAT-NTC <sup>R</sup> | CAGL2A.1                    | <i>Δrad52::SAT/Δrad52A::hisG-</i><br><i>URA3-hisG</i><br><i>Δrad59::hisG/Δrad59::hisG</i>  | <i>rad52,</i><br><i>URA3,</i><br><i>rad59</i> | This work                           |
| CAGL5B-SAT-NTC <sup>R</sup> | CAGL2B.1                    | <i>Δrad52::SAT/Δrad52B::hisG-</i><br><i>URA3-hisG</i><br><i>Δrad59::hisG/Δrad59::hisG</i>  | <i>rad52,</i><br><i>URA3,</i><br><i>rad59</i> | This work                           |
| CAGL6B-SAT-NTC <sup>R</sup> |                             | <i>Δrad52::SAT/Δrad52B::hisG-</i><br><i>URA3-hisG</i><br><i>Δlig4::hisG/Δlig4::hisG</i>    | <i>rad52,</i><br><i>URA3,</i><br><i>lig4</i>  | This work                           |
| CAGL4A-FRT                  | CAGL4A-SAT-NTC <sup>R</sup> | <i>Δrad52::FRT /Δrad52A::hisG-</i><br><i>URA3-hisG</i>                                     | <i>rad52,</i><br><i>URA3</i>                  | This work                           |
| CAGL4B-FRT                  | CAGL4B-SAT-NTC <sup>R</sup> | <i>Δrad52::FRT /Δrad52B::hisG-</i><br><i>URA3-hisG</i>                                     | <i>rad52,</i><br><i>URA3</i>                  | This work                           |
| CAGL5B** <sub>-</sub> FRT   | CAGL5A-SAT-NTC <sup>R</sup> | <i>Δrad52:: FRT/Δrad52A::hisG-</i><br><i>URA3-hisG</i><br><i>Δrad59::hisG/Δrad59::hisG</i> | <i>rad52,</i><br><i>URA3,</i><br><i>rad59</i> | This work                           |
| CAGL5B-FRT                  | CAGL5B-SAT-NTC <sup>R</sup> | <i>Δrad52::FRT/Δrad52B::hisG-</i><br><i>URA3-hisG</i><br><i>Δrad59::hisG/Δrad59::hisG</i>  | <i>rad52,</i><br><i>URA3,</i><br><i>rad59</i> | This work                           |
| CAGL6B-FRT                  | CAGL6B-SAT-NTC <sup>R</sup> | <i>Δrad52::FRT/Δrad52A::hisG-</i><br><i>URA3-hisG</i><br><i>Δlig4::hisG/Δlig4::hisG</i>    | <i>rad52,</i><br><i>URA3,</i><br><i>lig4</i>  | This work                           |
| CAGL27                      | CAI4                        | <i>RAD52/RAD52</i><br><i>SHE9/she9::his-URA3-hisG</i>                                      | <i>2 x</i>                                    | This work                           |

|        |       |                                                             |                               |           |
|--------|-------|-------------------------------------------------------------|-------------------------------|-----------|
|        |       |                                                             | <i>RAD52</i> ,<br><i>URA3</i> |           |
| CAGL28 | CAGL2 | <i>RAD52/rad52::hisG</i><br><i>SHE9/she9::his-URA3-hisG</i> | <i>RAD52</i><br><i>URA3</i>   | This work |

3  
4  
5  
6  
7  
8

Old names are in parenthesis. Strain CAGL5B\*\*-FRT was intended to be CAGL5A-FRT (tester A) since it was derived from CAGL2A but behaved as if carrying *RAD52B* as the test allele. It is likely that a reciprocal exchange between both *RAD52* alleles (gene conversion or crossover) occurred at some step during its generation. NAT<sup>R</sup>: Nourseothricin-resistant

**Table S2.** Primers used in this study.

| Primer name           | Primer sequence (5' → 3')    | Size/Comments                                |
|-----------------------|------------------------------|----------------------------------------------|
| RV1                   | CAACCACGACCACCACAACAA        | wt: 1.6 kb<br><i>rad52::hisG</i> : 1.3 kb    |
| RV2                   | TGCGGTATACCCGAAGAAGGA        |                                              |
| RV3                   | CGTGGCATTATGGCCTCTTC         | 2.5 kb                                       |
| URA3.2                | CGAATCGGCACTACAGC            |                                              |
| RV1                   | CAACCACGACCACCACAACAA        | 1.3 kb                                       |
| URA3det-R             | GTATGGGGTTGTTGCTCAGG         |                                              |
| RV2                   | TGCGGTATACCCGAAGAAGGA        | 1.8 kb                                       |
| URA3.1                | GGTATAGAAATGCTGCTTGG         |                                              |
| RAD52F- <i>Apa</i> I  | GCgggcccGCTAGGTGGAAAGTGTCGTG | Small letters: <i>Apa</i> I restriction site |
| RAD52R- <i>Xho</i> I  | GCATctcgagGGAGGTGCAGGTCTAGAG | Small letter: <i>Xho</i> I restriction site  |
| RAD52F- <i>Sac</i> II | GCcgcggGAGGAGGTTATAGGTATC    | Small letter: <i>Sac</i> II restriction site |
| RAD52R- <i>Sac</i> I  | GTCgagctcGGGACAGTTTCAATTCAG  | Small letter: <i>Sac</i> I restriction site  |
| RAD52R                | CTCAATGGTTTGGGTTATAGGATG     |                                              |
| SAT1F-Flip            | CTGGTACTGGTTCTCGGG           |                                              |
| RAD52-IF              | GCTGCAAGAGAGTACACAGA         |                                              |
| RAD52-IR              | CCATAGCCAACATCTTCATG         |                                              |
| SNP122-F              | GTGTGCTGGGTAATACGCT          | 227 bp                                       |
| SNP122-R              | GGCAAGACAATACCACAGT          |                                              |

|          |                         |                             |
|----------|-------------------------|-----------------------------|
| SNP123-F | GAGGAGATAGTTGTTGCTGTC   | 268 bp                      |
| SNP123-R | GTAGGCATTGACTACTGTGC    |                             |
| SNP132-F | TCTGTCGCCTGAGCTGTTTA    | 256 bp                      |
| SNP132-R | CCAAACGACCCAAAATACCC    |                             |
| SHE1     | GAACGTGAAGTGATAGAAGACGT | wt: 845 bp                  |
| SHE2     | CCCATCAAACCCAGTTCCCCAT  | <i>she9::hisG</i> : 1171 bp |
| SHE1     | GAACGTGAAGTGATAGAAGACGT | 1.3 kb                      |

9

10

11 **Table S3** (Excel File). Molecular characterization (SNPs and PFGE-Southern blots analysis) of individual parental strains and their 5FOA<sup>R</sup>  
12 segregants analyzed in this study.
